# Supplementary material
Source: PubMed Central journal article supplement (PMC3193494)
Supplement: cr201150x4.pdf [file cr201150x4.pdf]

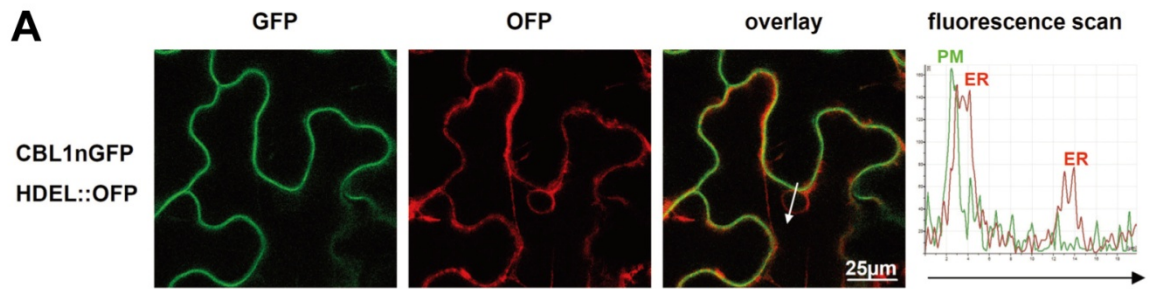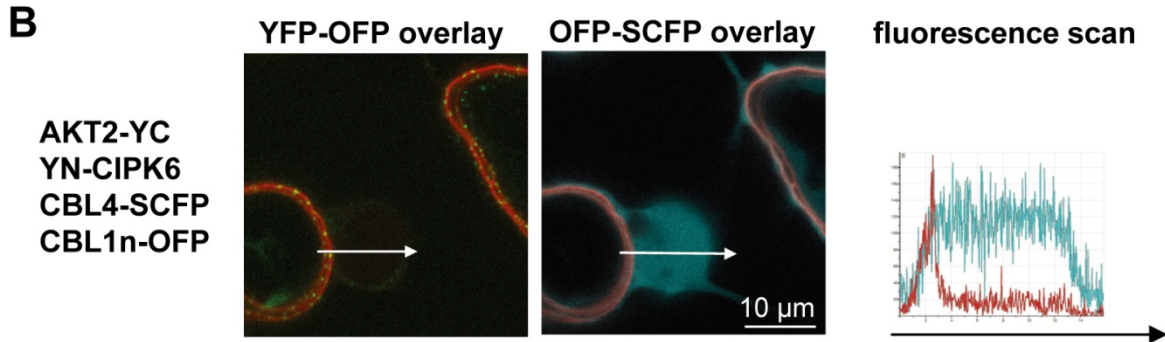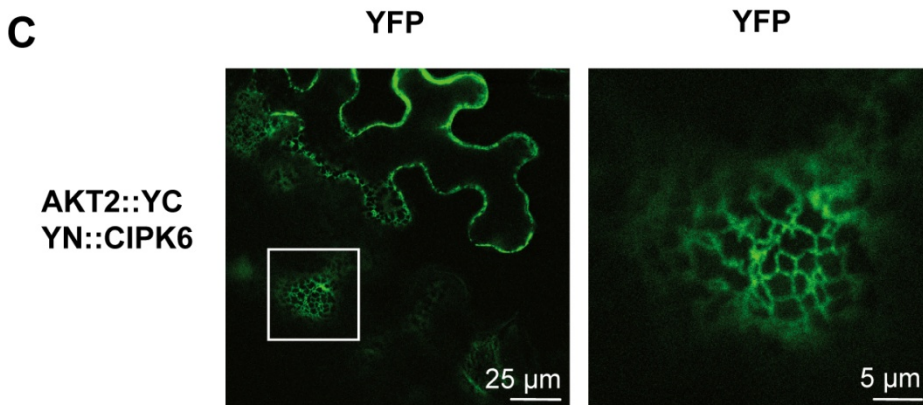

**Supplementary information, Figure S4** (A) Localization of the fluorescence markers CBL1nGFP (PM) and OFP-HDEL (ER). Separation of the markers in the different compartments is demonstrated in the fluorescence intensity scan and the source of the fluorescence is indicated in coloured writing. Position and direction of the scanned line is indicated by the arrow. (B) Co-localization of AKT2-CIPK6 complexes with the PM-marker CBL1n-OFP in presence of CBL4-SCFP. Presented is a detail of Figure 3 C. The respective combinations of expressed plasmids are indicated in the left. CBL4 is localized not only in the PM, but also detected in the nucleus and in cytoplasmic strands (blue). The white arrow marks the line where the fluorescence scan was performed. This corresponds to the fluorescence scan depicted in Figure 3 C. (C) View into the optical plane of the cell periphery showing the

ER localization of AKT2-CIPK6 BiFC complexes in absence of CBL4. A netlike structure is visible in contrast to the punctate structures of the AKT2-CIPK6-signal in presence of CBL4 (Figure 3 D). Enlargement of the area showing the cell periphery is indicated by a white frame.
