# Supplementary material
Source: PubMed Central journal article supplement (PMC3193494)
Supplement: cr201150x5.pdf [file cr201150x5.pdf]

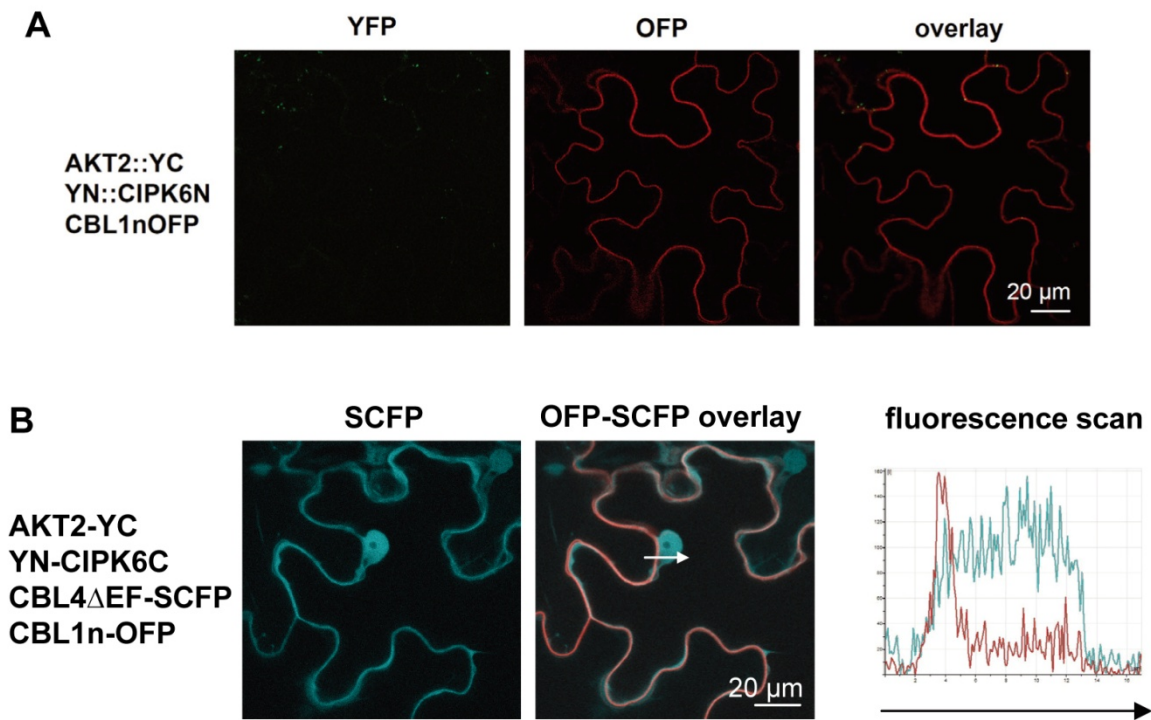

**Supplementary information, Figure S5 (A)** No interaction of the CIPK6 kinase domain alone with AKT2 was observed in BiFC experiments. Co-expression of AKT2-YC and YN-CIPK6N constructs revealed only background levels of fluorescence in transiently transformed tobacco leaves. PM marker CBL1n-OFP was co-expressed to visualize the cell perimeter. **(B)** Distinct localization of AKT2-CIPK6C complexes and the PM-marker CBL1n-OFP in presence of CBL4ΔEF-SCFP. Presented is a detail of Figure 5 E. The respective combinations of expressed plasmids are indicated in the left. CBL4ΔEF-SCFP is localized not only in the PM, but also detected in the nucleus and in cytoplasmic strands (blue). The white arrow marks the line where the fluorescence scan was performed. This corresponds to the fluorescence scan depicted in Figure 5 E.
