# Supplementary material
Source: PubMed Central journal article supplement (PMC3193494)
Supplement: cr201150x6.pdf [file cr201150x6.pdf]

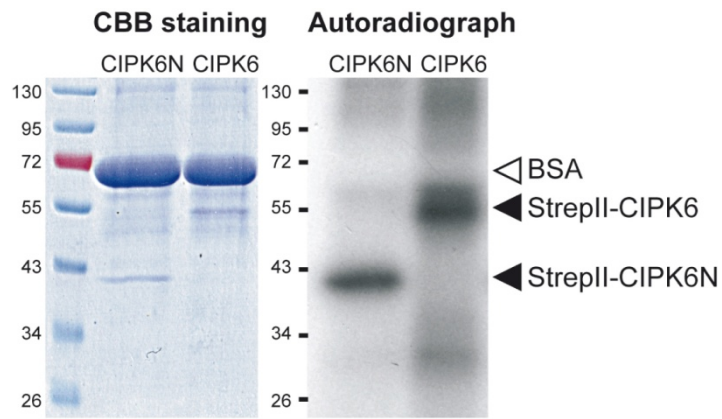

**Supplementary information, Figure S6** CIPK6N which lacks C-terminal regulatory domain showed autophosphorylation activity *in vitro* similar as the full-length kinase protein.

Left panel shows CBB staining and right panel shows autoradiograph.
