# Supplementary material
Source: PubMed Central journal article supplement (PMC3193494)
Supplement: cr201150x7.pdf [file cr201150x7.pdf]

**Supplementary information, Table S1** PCR primers used for this study. Restriction sites are underlined.

| Primer       | Sequence 5'-3'                                                    |
|--------------|-------------------------------------------------------------------|
| CBL4-f       | TTT <u>GTCGAC</u> GGCTGCTCTGTATCG                                 |
| CBL4-r       | TTT <u>CCCGGG</u> GGAAGATACGTTTTGC                                |
| CIPK6-f      | TTT <u>ACTAGT</u> ATGGTCGGAGCAAAACCGG                             |
| CIPK6-r      | TTT <u>CTCGAG</u> AGCAGGTGTAGAGGTCCAG                             |
| AKT2full-f   | TTT <u>ACTAGT</u> ATGGACCTCAAGTATTCAGCATC                         |
| AKT2Ct-f     | TTT <u>ACTAGT</u> GAATTTAGGAATAGC                                 |
| AKT2-r       | AA <u>CCCGGG</u> AATTATCTTGTTTACGACAAAGTAGAGTTTG                  |
| CIPK24-f     | TTT <u>GGATCC</u> ACAAAGAAAATGAGAAGAGTGG                          |
| CIPK24-r     | AA <u>CCCGGG</u> AAACGTGATTGTTCTGAGAATCTCT                        |
| SOS1Ct-f     | TGTT <u>CTAGA</u> AATGGGATCCACTACCC                               |
| SOS1Ct-r     | TTT <u>CCCGGG</u> TAGATCGTTCCTGAAAACG                             |
| CIPK6R-f     | TTT <u>ACTAGT</u> ATGGATTGCCTTGGTTCAAG                            |
| CIPK6N-r     | TTT <u>CTCGAGT</u> GAGAACCAAGGCGAATCCATAAC                        |
| CIPK6Xho-f   | TTT <u>CTCGAG</u> AAAATGGTCGGAGCAAAACCG                           |
| CIPK6T182D-f | CAAGACGGACTTCTTCATGATACTTGTGGA <u>ACTCCGG</u> CCTTATG             |
| CIPK6T182D-r | CATAAGCCGGAGTTCACAAGTATCATGAAGAAGTCCGTCTTG                        |
| CBL1-f       | TTT <u>GGATCC</u> TGAATGGGCTGCTTCCACTCAAAG                        |
| CBL1FLAG-r   | TTT <u>GAATTCT</u> CACTTGTATCGTCGTCCTTGTAGTCTGTGGCAATCTCATCGACCTC |
| CBL4-f2      | TTT <u>CCCGGG</u> CATGGGCTGCTCTGTATCGAAG                          |
| CBL4-r2      | AAAAGT <u>CGACTT</u> AGGAAGATACGTTTTGCAATTCC                      |
| CBL9-f       | TTT <u>GGATCC</u> CATGGGTTGTTCCATTCCAC                            |
| CBL9-r       | TTT <u>GAATTCT</u> CACGTCGCAATCTCGTC                              |
| CIPK6-f2     | TTT <u>GGATCC</u> CATGGTCGGAGCAAAACCGG                            |
| CIPK6-r2     | TTT <u>GAATTCT</u> CAAGCAGGTGTAGAGGTCCA                           |
| CIPK23-f     | TTT <u>ACTAGT</u> TATGGCTTCTCGAACAACG                             |
| CIPK23-r     | TTTT <u>CTCGAGT</u> TATGTCGACTGTTTTGCAATT                         |
| CBL4RT-f     | CATCCGTCA <u>CGCCATTC</u>                                         |
| CBL4RT-r     | CGTCCTATTTATGTCCTTTAGATATGG                                       |
